# Supplementary material
Source: PubMed Central journal article supplement (PMC3287000)
Supplement: 1104303108_pnas.201104303SI.pdf [file 1104303108_pnas.201104303SI.pdf]

# Supporting Information

Ruffell et al. 10.1073/pnas.1104303108

## SI Materials and Methods

**Flow Cytometry.** Freshly resected tissue was manually minced and then incubated for 45 min at 37 °C in DMEM (Invitrogen) with 2.0 mg/mL Collagenase A (Roche) and 50 units/mL DNase I (Roche). Single cell suspensions were prepared by filtering through 70- $\mu$ m nylon strainers (BD Biosciences), and  $<10^6$  cells were incubated for 30 min on ice with Fc Receptor Binding Inhibitor (eBioscience) diluted 1/10 in PBS containing Live Dead Aqua (1:500, Invitrogen). Cells were then incubated for 30 min in PBS containing 1.0 mM EDTA and 5% FCS along with manufacturers' suggested dilutions of fluorescently labeled primary monoclonal antibodies (Table S2). After washing once, cells were fixed with BD Cytofix for 30 min on ice, washed again, and stored at 4 °C until analysis with an LSRII flow cytometer (BD Bioscience). Before intracellular FoxP3 staining, cells were instead fixed with the FoxP3 Fixation/Permeabilization system (eBioscience) according to the manufacturer's instructions.

**Immunohistochemistry.** Sections (5  $\mu$ m) of formalin-fixed, paraffin-embedded tissues were deparaffinized with xylene, rehydrated, immersed in antigen retrieval citra (BioGenex), then heated for 7 min at maximum power in a microwave, followed by a 30-min incubation in the heated buffer. After washing 3 times in PBS and surrounding tissues with a hydrophobic Super Pap Pen (The Binding Site), peroxidase activity and nonspecific binding was blocked with appropriate components of the Thermo Scientific Ultravision Detection Kit according to the manufacturer's instructions. After a second blocking step with PBS containing 5% goat serum, 2.5% BSA, and 0.1% Tween-20, unlabeled primary antibodies (Table S3) were diluted according to manufacturers' recommendations and added to sections overnight at 4 °C. After washing, antibodies were detected by using the appropriate components of the Thermo Scientific Ultravision Detection Kit according to manufacturer's instructions. After development with liquid DAB, slides were washed in H<sub>2</sub>O, counterstained briefly with 1% Methyl Green, dehydrated, and mounted with Cytoseal (Thermo Scientific). Representative images and quantitative image analysis was done by using the Aperio ScanScope CS Slide Scanner (Aperio Technologies) system with a 20 $\times$  or

40 $\times$  objective to capture whole-slide images. Positive staining was assessed with the nuclear default algorithm (Aperio).

**Immunofluorescence.** Sections (10  $\mu$ m) of PFA fixed, sucrose protected, OCT embedded tissues were thawed at 37 °C for 10 min, permeabilized with 100% ice-cold acetone for 10 min, washed in PBS, and then blocked with goat blocking buffer for 2 h. To use two primary antibodies from the same species, one antibody was added at a 100-fold reduced dilution overnight at 4 °C in 0.5 $\times$  blocking buffer, and after washing, slides were incubated with a biotinylated anti-mouse or rabbit secondary (Vector Laboratories) for 30 min. The signal from the diluted antibody was then amplified with a TSA indirect kit (Perkin-Elmer) according to manufacturer's instructions. After extensive washing, additional primary antibodies were added overnight at 4 °C. After another round of washing, goat anti-mouse Alexa 488, donkey anti-rabbit or anti-mouse Alexa 546, and streptavidin Alexa 647 (1/500, Invitrogen) were used to detect all three antibodies. To use three primary murine antibodies, slides were blocked with 5.0  $\mu$ g/mL mouse IgG1 and IgG2a (BioLegend) for 30 min after detection of the first primary antibody with anti-mouse Alexa 647. Slides were then incubated with two primary antibodies directly conjugated to either FITC or Cy3 for 3 h, washed, and incubated with goat anti-FITC Alexa 488 (Invitrogen). Slides were mounted with ProLong Gold with DAPI anti-fade mounting medium (Invitrogen) overnight, and images were acquired by using a LSM510 Confocal Laser Scanning Microscope (Carl Zeiss).

**Real-Time PCR.** Culture and exposure of human BC cell lines to CTX agents was performed as described (1). mRNA was isolated from cells by using the RNeasy mini kit (Qiagen), contaminating DNA was removed by DNase I (Invitrogen) digestion, and reverse transcription into cDNA was performed by using SuperScript III (Invitrogen) according to the manufactures' directions. Real-time PCR was performed by using the Taqman system after a preamplification step with TaqMan PreAmp (Applied Biosystems) according to the manufacturer's instructions.

1. DeNardo DG, et al. (2011) Leukocyte complexity in breast cancer predicts overall survival and functionally regulates response to chemotherapy. *Cancer Discovery* 1: 54–67.













**Table S2. Antibodies used for flow cytometry**

| Antigen                    | Clone     | Fluorophore      | Company     | Catalog no. |
|----------------------------|-----------|------------------|-------------|-------------|
| CD3 $\epsilon$             | OKT3      | PerCP-eFluor 710 | eBioscience | 46-0037-42  |
| CD3 $\epsilon$             | OKT3      | PerCP-Cy5.5      | eBioscience | 45-0037-42  |
| CD4                        | RPA-T4    | Qdot 655         | Invitrogen  | Q10007      |
| CD4                        | RPA-T4    | PE               | BioLegend   | 300508      |
| CD8 $\alpha$               | RPA-T8    | APC-eFluor 780   | eBioscience | 47-0088-42  |
| CD8 $\alpha$               | RPA-T8    | Qdot 605         | Invitrogen  | Q10009      |
| CD11b                      | ICRF44    | PE-Cy7           | eBioscience | 25-0118-42  |
| CD11c                      | 3.9       | Alexa 700        | eBioscience | 56-0116-73  |
| CD14                       | 61D3      | Qdot 655         | Invitrogen  | Q10056      |
| CD15                       | W6D3      | Alexa 647        | BioLegend   | 323012      |
| CD19                       | H1B19     | Alexa 700        | eBioscience | 56-0199-73  |
| CD19                       | H1B19     | PerCP-Cy5.5      | eBioscience | 45-0199-73  |
| CD20                       | 2H7       | Alexa 700        | BioLegend   | 302322      |
| CD20                       | 2H7       | PerCP-Cy5.5      | BioLegend   | 302326      |
| CD25                       | BC96      | PE-Cy5           | BioLegend   | 302608      |
| CD25                       | BC96      | PE-Cy7           | eBioscience | 25-0259-42  |
| CD27                       | O323      | Alexa700         | eBioscience | 56-0279-73  |
| CD28                       | CD28.2    | PE-Cy7           | eBioscience | 25-0289-42  |
| CD45                       | H130      | Qdot 705         | Invitrogen  | Q10062      |
| CD45                       | H130      | APC-780          | eBioscience | 47-0459-42  |
| CD45RA                     | HI100     | Qdot 605         | Invitrogen  | Q10047      |
| CD45RO                     | UCHL1     | Alexa700         | BioLegend   | 304218      |
| CD49d                      | 9F10      | PE-Cy5           | BioLegend   | 304306      |
| CD56                       | HCD56     | PE-Cy5           | BioLegend   | 318308      |
| CD56                       | HCD56     | PerCP-Cy5.5      | BioLegend   | 318322      |
| CD69                       | FN50      | FITC             | eBioscience | 11-0699-73  |
| CD85g                      | 17G10.2   | APC              | eBioscience | 17-5179-42  |
| CD86                       | IT2.2     | PE-Cy5           | eBioscience | 15-0869-73  |
| CD117                      | YB5.B8    | PE               | eBioscience | 12-1179-42  |
| CD127                      | eBioRDR5  | 650NC            | eBioscience | 95-1278-42  |
| CCR4                       | TG6       | PE-Cy7           | BioLegend   | 335405      |
| CCR5                       | HEK/1/85a | PE               | BioLegend   | 313708      |
| CCR7                       | TG8       | Alexa 647        | BioLegend   | 335603      |
| CXCR3                      | TG1       | Alexa 647        | BioLegend   | 334903      |
| Fc $\epsilon$ R1           | AER-37    | FITC             | eBioscience | 11-5899-73  |
| FoxP3                      | PCH101    | PE-Cy5           | eBioscience | 15-4776-42  |
| HLA-DR                     | L243      | eFluor450        | eBioscience | 48-9952-42  |
| $\gamma\delta$ TCR         | B1.1      | Alexa 647        | BioLegend   | 331214      |
| V $\alpha$ 24J $\alpha$ 18 | 6B11      | PE               | eBioscience | 12-5806-42  |

**Table S3. Antibodies used for immunohistochemistry and immunofluorescence**

| Antigen                  | Species | Dilution | Company           | Catalog no. |
|--------------------------|---------|----------|-------------------|-------------|
| CD3                      | Rabbit  | 1/150    | Thermo Scientific | RM-9107-S1  |
| CD4                      | Mouse   | 1/20     | Thermo Scientific | MS-1528-S1  |
| CD8                      | Mouse   | 1/100    | Thermo Scientific | MS-457-S1   |
| CD20                     | Mouse   | 1/50     | Abcam             | Ab9475      |
| CD31 FITC                | Mouse   | 1/10     | BioLegend         | 303104      |
| CD45                     | Mouse   | 1/100    | eBioscience       | 14-0459-82  |
| CD45 FITC                | Mouse   | 1/10     | BioLegend         | 304003      |
| CD68                     | Mouse   | 1/100    | Thermo Scientific | MS-397-P    |
| CSF1R                    | Rabbit  | 1/100    | Abcam             | 61137       |
| Pan-keratin<br>Alexa 488 | Mouse   | 1/100    | Cell Signaling    | 4523        |
| FoxP3                    | Mouse   | 1/40     | eBioscience       | 14-4777-82  |
| Granzyme B               | Mouse   | 1/50     | Thermo Scientific | MS-1157-S1  |
